# Supplementary material
Source: Springer Nature journal article supplement (https://www.springermedizin.de/resource/supplementary/12943_2014_1448_MOESM2_ESM.pdf/9553036)
Supplement: MOESM2 [file 9553036]

**A**

| miRNA          | p-Value   | Log <sub>10</sub> (PWR-1E DU-145) | 5' ---- MIEN1 3'UTR ---- 3'<br>         <br>3' miRNA 5'                                                                      | Prediction Tool                     |
|----------------|-----------|-----------------------------------|------------------------------------------------------------------------------------------------------------------------------|-------------------------------------|
| hsa-miR-324-3p | 4.65 e-01 | 0.60                              | GAUCCGUGGCCUUGGGGGCAGG<br>         <br>GGUCGUCGUGGACCCCGUCA<br>TCGAGTCGCGCCTCGGGGGCACAG<br>         <br>GGUCGUCGUGGACCCCGUCA | miRanda, TargetScan, MicroInspector |
| hsa-miR-221    | 9.64 e-03 | 0.64                              | AACCCAG==GGCAATGT CAGCT<br>         <br>UUGGGUCGUCUGUUACA=UCGA                                                               | miRanda                             |
| hsa-miR-940    | 3.63 e-02 | 0.90                              | GCUGGGAGCUCC==CCUGCCUC<br>         <br>CCCUCGCCCCGGGACGGAA                                                                   | TargetScan miRanda                  |

**B**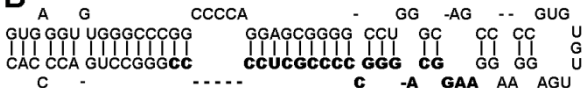**C**

Mature miR-940

```

hsa    GUGAGUGUGGGCCGGCCGAGGAGCGGGCCUGGGAGC CCGGUGUUGAGGAGG AMGGCAGGGCCCCGCUCCCGGGGUGAGCCAC
gga    ACCAGUUCUUGAGUUGGGUCUGGCCUAGAGUCGGGGCCUGGGAGC CCGGUGUUGAGGAGG AMGGCAGGGCCCCGCUCCCGGGGUGAGCCACUGGCCU
mm1    GUUGGUUGUGGGCCGGCCGAGGAGCGGGCCUGGGAGC CCGGUGUUGAGGAGG AMGGCAGGGCCCCGCUCCCGGGGUGAGCCACUGGCCU
ptr    UUGAGUUGUGGGCCGGCCGAGGAGCGGGCCUGGGAGC CCGGUGUUGAGGAGG AMGGCAGGGCCCCGCUCCCGGGGUGAGCCACUGGCCU
bta    GUGUGUUGUGGGCCGGCCGAGGAGCGGGCCUGGGAGC CCGGUGUUGAGGAGG AMGGCAGGGCCCCGCUCCCGGGGUGAGCCAC
  
```
